# Supplementary material for: Plant NLR immune receptor Tm-22 activation requires NB-ARC domain-mediated self-association of CC domain
Source: PubMed Central journal article supplement (PMC7205312; doi:10.1371/journal.ppat.1008475), 2020-04-27
Supplement: ppat.1008475.s001.pdf [file ppat.1008475.s001.pdf]

**S1 Table.** Primers used in this study.

|                              |                           |                                                                          |
|------------------------------|---------------------------|--------------------------------------------------------------------------|
| For generating CC-LIC vector | Tm-2 <sup>2</sup> -LIC1-F | <b>CGACGACAAGACCGTGACCATGGCTGAAATTCTTCTTACATCAG</b>                      |
|                              | CC-LIC2-R                 | <b>GAGGAGAAGAGCCGTCGAACACAATCATCATTATTGTTAT</b>                          |
| For mYFP (A206K)             | mYFP-F                    | GCTACCAGTCCAAGCTGAGCAAAGAC                                               |
|                              | mYFP-R                    | GTCTTTGCTCAGCTTGGACTGGTAGC                                               |
| For CC-NB                    | NB-LIC2-R                 | <b>GAGGAGAAGAGCCGTCGACTATTTTCGAGACGTGATTATCATTCTAC</b>                   |
| For-CC-NB-ARC1               | ARC1-LIC2-R               | <b>GAGGAGAAGAGCCGTCGACATCCATCTTGAACCTTTATGGCCC</b>                       |
| For CC-DP                    | DP-LIC2-R                 | <b>GAGGAGAAGAGCCGTCGAGACTTAACAATCAAAAATTC</b><br>AACACAATCATCATTATTGTTAT |
| For CC-mDP                   | mDP-LIC2-R                | <b>GAGGAGAAGAGCCGTCGAGACTTAACCTTCAAAAATTC</b><br>AACACAATCATCATTATTGTTAT |
| For R291A                    | R291A-F                   | GATAATCACGTCTGCAAATAGTAATGTAG                                            |
|                              | R291A-R                   | CTACATTACTATTTGCAGACGTGATTATC                                            |
| For L233A                    | L233A-F                   | CCAAACAAATTGGAGCTACGGAACAGAAAATG                                         |
|                              | L233A-R                   | CATTTTCTGTTCCGTAGCTCCAATTTGTTTGG                                         |
| For L242A                    | L242A-F                   | GAAAATGAAGGAAAATGCTGAGGACAACCTGCGATC                                     |
|                              | L242A-R                   | GATCGCAGGTTGTCCTCAGCATTTTCCTTCATTTTC                                     |
| For L246A                    | L246A-F                   | TGGAGGACAACGCACGATCACTCTT                                                |
|                              | L246A-R                   | AAGAGTGATCGTGCGTTGTCCTCCA                                                |

Letters in bold indicate LIC1 or LIC2 adaptor sequences.
